# Supplementary material
Source: PubMed Central journal article supplement (PMC4827161)

# Suppl. Fig.1

A

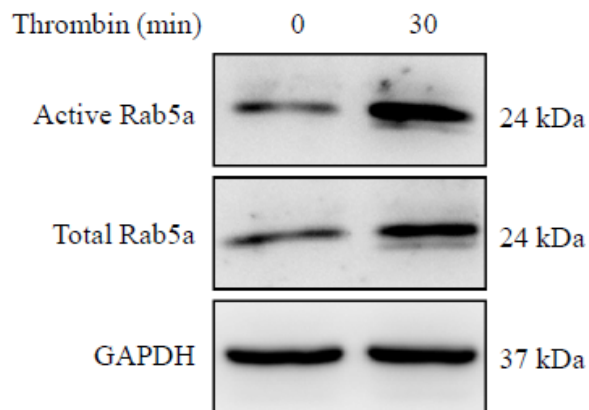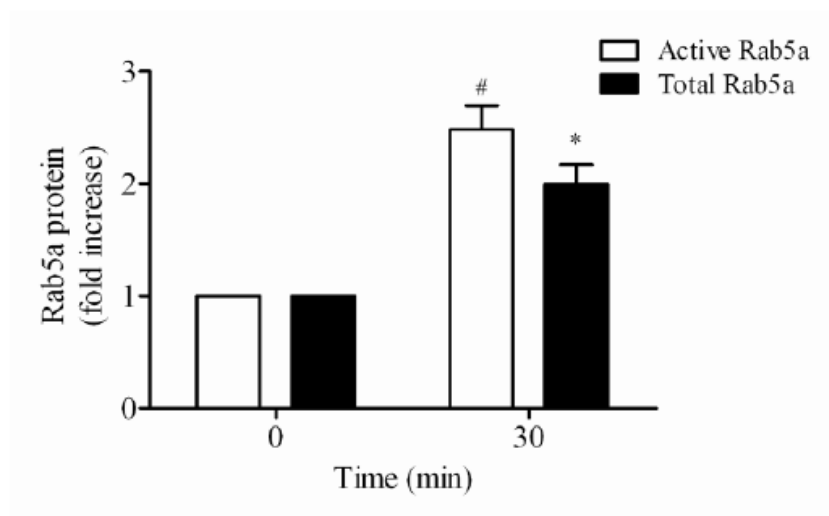

Supplement: NIHMS770110-supplement-1.pdf [file NIHMS770110-supplement-1.pdf]

**Suppl. Fig. 2**

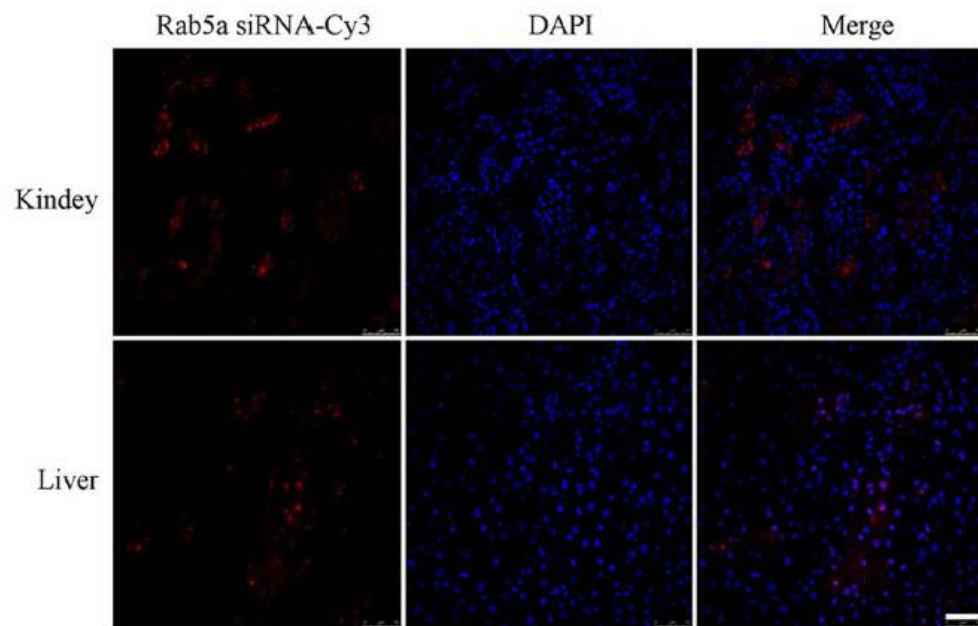

Supplement: NIHMS770110-supplement-2.pdf [file NIHMS770110-supplement-2.pdf]
